# Supplementary material for: Mutual Modulation of the Activities of Human CYP2D6 and Four UGTs during the Metabolism of Propranolol
Source: MDPI journal article supplement (doi:10.3390/cimb45090451), 2023-08-26
Supplement: s1 [file s1]

Supplementary Figure S1.

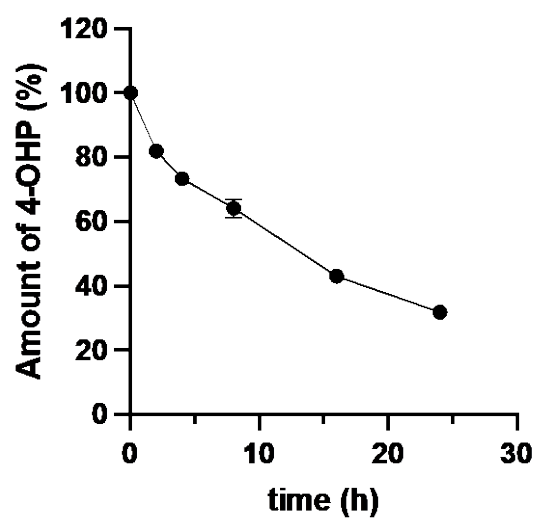

Degradation assay of 4-hydroxypropranolol (4-OHP). The samples were treated under the same conditions as in enzyme bags reactions but without yeast cells. The amount of 4-hydroxypropranolol left at six time points (0 h, 2 h, 4 h, 8 h, 16 h and 24 h) were analyzed and normalized to values at  $T_0 = 0$  h. All reactions were done in triplicates.
